# Supplementary material for: Regulatory Role of Glycerol in Candida albicans Biofilm Formation
Source: PubMed Central journal article supplement — mBio. 2013 Apr 9;4(2):e00637-12. doi: 10.1128/mBio.00637-12 (PMC3622937; doi:10.1128/mbio.00637-12), 2013-04-09
Supplement: mbo002131491sf01.pdf [file mbo002131491sf01.pdf]

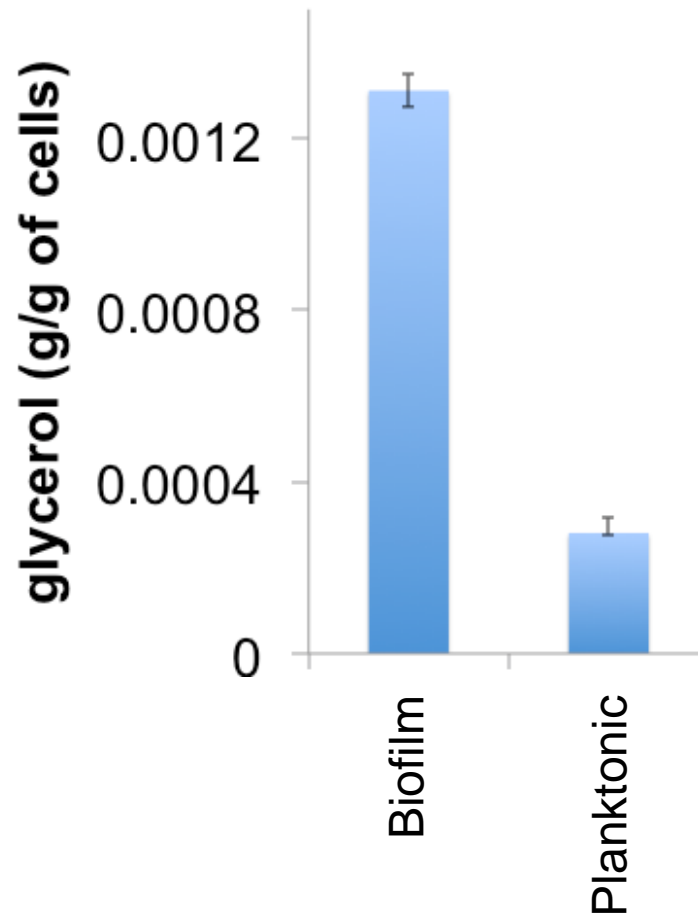

**Figure S1: Glycerol assay.** The wild type strain (DAY185) was used to grow cells under biofilm and planktonic conditions. Cell harvesting and glycerol extraction were performed as described under methods. The plot displays content of glycerol normalized against cell weight (average of two independent measurements with error-bars showing standard deviation).
