# Supplementary material for: Regulatory Role of Glycerol in Candida albicans Biofilm Formation
Source: PubMed Central journal article supplement — mBio. 2013 Apr 9;4(2):e00637-12. doi: 10.1128/mBio.00637-12 (PMC3622937; doi:10.1128/mbio.00637-12), 2013-04-09
Supplement: mbo002131491sf02.pdf [file mbo002131491sf02.pdf]

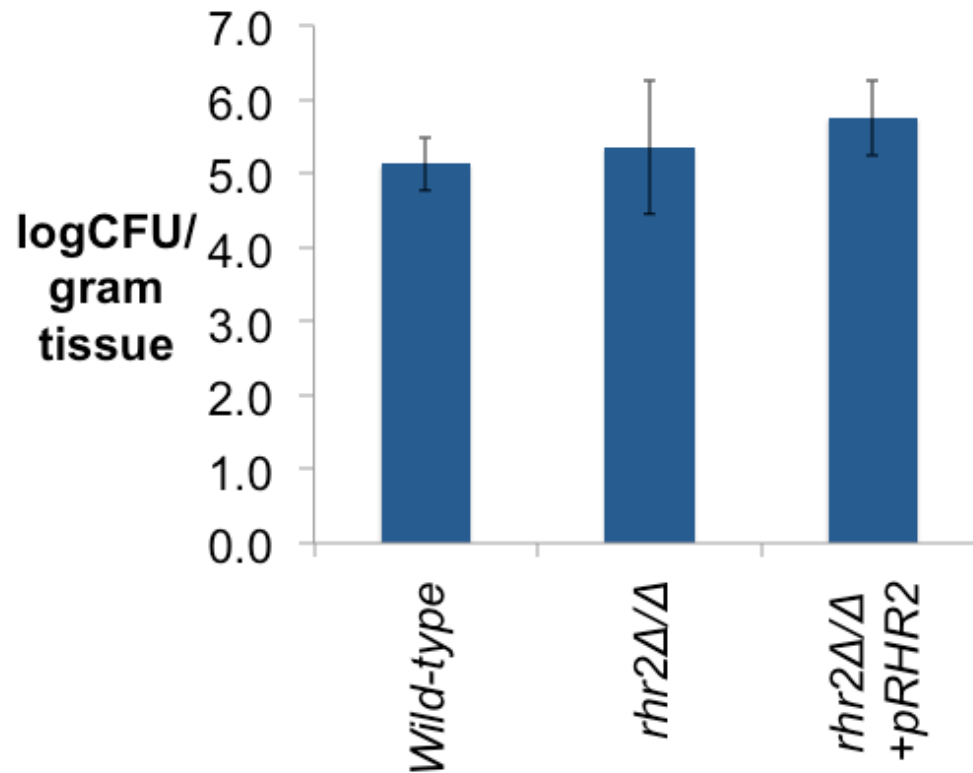

**Figure S2: OPC virulence analysis.** Mice infected with the indicated strains were euthanized 5 days post infection and the tongue tissues were removed, homogenized and the colony forming units (CFU) were determined. The plot shows average (log CFU/gram tissue) with the error-bars depicting standard deviation (n=5).
