# Supplementary material for: Regulatory Role of Glycerol in Candida albicans Biofilm Formation
Source: PubMed Central journal article supplement — mBio. 2013 Apr 9;4(2):e00637-12. doi: 10.1128/mBio.00637-12 (PMC3622937; doi:10.1128/mbio.00637-12), 2013-04-09
Supplement: mbo002131491sf03.pdf [file mbo002131491sf03.pdf]

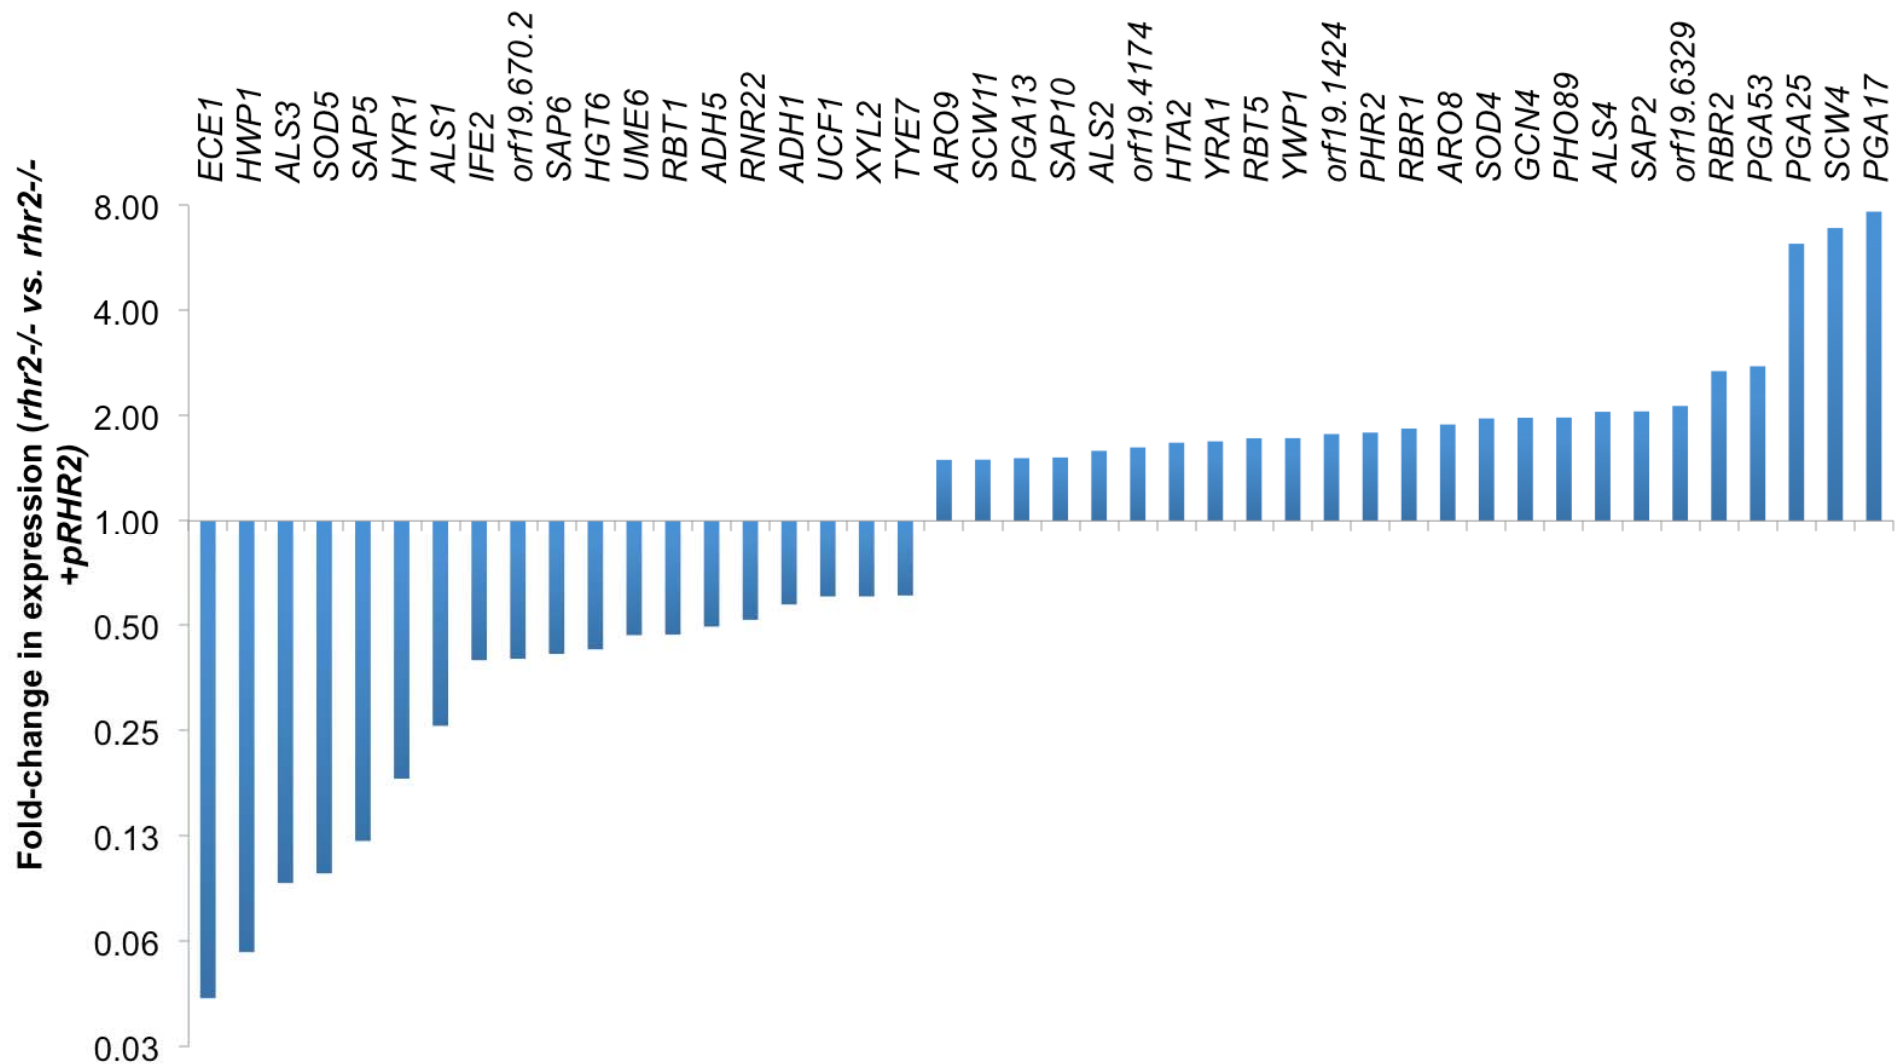

**Figure S3: Nanostring gene expression analysis.** The *rhr2*<sup>-/-</sup> mutant and *rhr2*<sup>-/-</sup>+*pRHR2* complemented strain were grown overnight in YPD at 30°C and then subcultured in Spider medium at OD<sub>600nm</sub> of 0.2. They were grown for additional 8 hours at 37°C. Cells were then harvested for RNA isolation. This RNA was used for Nanostring gene expression assay. The displayed plot shows fold change in normalized expression of genes in *rhr2*<sup>-/-</sup> mutant relative to the complemented strain. Only the genes showing fold-change <0.67 or >1.5 are shown here.
